# Supplementary material for: The association between time-weighted remnant cholesterol and cardiovascular and non-cardiovascular mortality: A population-based cohort study
Source: bioRxiv or medRxiv preprint supplement (doi:10.1101/2024.02.08.24302507), 2024-02-09

**Supplementary Appendix to**

**The association between time-weighted remnant cholesterol and cardiovascular and non-cardiovascular mortality: A population-based cohort study**

**Table of Contents**

***Supplementary Table 2. Formula of the variability measures .....5***

***Supplementary Table 3. The baseline, and clinical characteristics of patients in the study cohorts of four quartiles remnant cholesterol. ....6***

***Supplementary Table 4. The outcome of patients in the study cohorts of four quartiles remnant cholesterol..... 11***

***Supplementary Figure 1. Distribution and association analysis between remnant cholesterol and HDL-C, LDL-C, TC, and TG. .... 12***

***Supplementary Figure 2. Cumulative incidence curves stratified by quartiles of remnant cholesterol to predict mortality outcome. .... 14***

***Supplementary Figure 4. Restricted cubic spline comparing predicted cause-specific mortality between individuals with and without prior atherosclerotic cardiovascular disease..... 18***

**Supplementary Table 1. International Classification of Diseases Ninth Version (ICD-9) codes for baseline comorbidities.**

|                             |        |        |        |        |        |        |        |        |        |        |        |        |        |        |        |        |        |        |        |        |        |        |        |        |        |        |        |        |        |        |        |        |        |        |        |        |        |        |        |        |        |        |        |        |        |        |        |        |        |        |       |        |        |       |        |        |       |        |        |        |       |       |       |        |        |        |        |        |        |       |
|-----------------------------|--------|--------|--------|--------|--------|--------|--------|--------|--------|--------|--------|--------|--------|--------|--------|--------|--------|--------|--------|--------|--------|--------|--------|--------|--------|--------|--------|--------|--------|--------|--------|--------|--------|--------|--------|--------|--------|--------|--------|--------|--------|--------|--------|--------|--------|--------|--------|--------|--------|--------|-------|--------|--------|-------|--------|--------|-------|--------|--------|--------|-------|-------|-------|--------|--------|--------|--------|--------|--------|-------|
| Diabetes mellitus           | 250    | 250.01 | 250.02 | 250.03 | 250.1  | 250.11 | 250.12 | 250.13 | 250.2  | 250.21 | 250.22 | 250.23 | 250.3  | 250.31 | 250.32 | 250.33 | 250.4  | 250.41 | 250.42 | 250.43 | 250.5  | 250.51 | 250.52 | 250.53 | 250.6  | 250.61 | 250.62 | 250.63 | 250.7  | 250.71 | 250.72 | 250.73 | 250.8  | 250.81 | 250.82 | 250.83 | 250.9  | 250.91 | 250.92 | 250.93 |        |        |        |        |        |        |        |        |        |        |       |        |        |       |        |        |       |        |        |        |       |       |       |        |        |        |        |        |        |       |
| Renal diseases              | 582    | 582    | 582.1  | 582.2  | 582.4  | 582.8  | 582.81 | 582.89 | 582.9  | 583    | 583    | 583.1  | 583.2  | 583.4  | 583.6  | 583.7  | 585    | 585.1  | 585.2  | 585.3  | 585.4  | 585.5  | 585.6  | 585.9  | 586    | 588    | 588    | 588.1  | 588.8  | 588.81 | 588.89 | 588.9  |        |        |        |        |        |        |        |        |        |        |        |        |        |        |        |        |        |        |       |        |        |       |        |        |       |        |        |        |       |       |       |        |        |        |        |        |        |       |
| Cerebrovascular disease     | 430    | 431    | 432    | 432.1  | 432.9  | 433    | 433.01 | 433.1  | 433.11 | 433.2  | 433.21 | 433.3  | 433.31 | 433.8  | 433.81 | 433.9  | 433.91 | 434    | 434.01 | 434.1  | 434.11 | 434.9  | 434.91 | 435    | 435.1  | 435.2  | 435.3  | 435.8  | 435.9  | 436    | 437    | 437.1  | 437.2  | 437.3  | 437.4  | 437.5  | 437.6  | 437.7  | 437.8  | 437.9  | 438    | 438.1  | 438.11 | 438.12 | 438.13 | 438.14 | 438.19 | 438.2  | 438.21 | 438.22 | 438.3 | 438.31 | 438.32 | 438.4 | 438.41 | 438.42 | 438.5 | 438.51 | 438.52 | 438.53 | 438.6 | 438.7 | 438.8 | 438.81 | 438.82 | 438.83 | 438.84 | 438.85 | 438.89 | 438.9 |
| Acute myocardial infarction | 410    | 410    | 410    | 410.01 | 410.02 | 410.1  | 410.1  | 410.11 | 410.12 | 410.2  | 410.2  | 410.21 | 410.22 | 410.3  | 410.3  | 410.31 | 410.32 | 410.4  | 410.4  | 410.41 | 410.42 | 410.5  | 410.5  | 410.51 | 410.52 | 410.6  | 410.6  | 410.61 | 410.62 | 410.7  | 410.7  | 410.71 | 410.72 | 410.8  | 410.8  | 410.81 | 410.82 | 410.9  | 410.9  | 410.91 | 410.92 | 412    |        |        |        |        |        |        |        |        |       |        |        |       |        |        |       |        |        |        |       |       |       |        |        |        |        |        |        |       |
| Hypertension                | 401    | 401.1  | 401.9  | 402    | 402.01 | 402.1  | 402.11 | 402.9  | 402.91 | 403    | 403.01 | 403.1  | 403.11 | 403.9  | 403.91 | 404    | 404.01 | 404.02 | 404.03 | 404.1  | 404.11 | 404.12 | 404.13 | 404.9  | 404.91 | 404.92 | 404.93 | 405    | 405.01 | 405.09 | 405.1  | 405.11 | 405.19 | 405.9  | 405.91 | 405.99 | 437.2  |        |        |        |        |        |        |        |        |        |        |        |        |        |       |        |        |       |        |        |       |        |        |        |       |       |       |        |        |        |        |        |        |       |
| Heart failure               | 428    | 428    | 428.1  | 428.2  | 428.2  | 428.21 | 428.22 | 428.23 | 428.3  | 428.3  | 428.31 | 428.32 | 428.33 | 428.4  | 428.4  | 428.41 | 428.42 | 428.43 | 428.9  | 398.91 | 402.01 | 402.11 | 402.91 | 404.01 | 404.03 | 404.11 | 404.13 | 404.91 | 404.93 |        |        |        |        |        |        |        |        |        |        |        |        |        |        |        |        |        |        |        |        |        |       |        |        |       |        |        |       |        |        |        |       |       |       |        |        |        |        |        |        |       |
| Atrial fibrillation         | 427.31 | 429.4  |        |        |        |        |        |        |        |        |        |        |        |        |        |        |        |        |        |        |        |        |        |        |        |        |        |        |        |        |        |        |        |        |        |        |        |        |        |        |        |        |        |        |        |        |        |        |        |        |       |        |        |       |        |        |       |        |        |        |       |       |       |        |        |        |        |        |        |       |
| Liver diseases              | 456    | 456.1  | 456.2  | 572.2  | 572.3  | 572.4  | 572.8  | 571.4  | 571.5  | 571.6  |        |        |        |        |        |        |        |        |        |        |        |        |        |        |        |        |        |        |        |        |        |        |        |        |        |        |        |        |        |        |        |        |        |        |        |        |        |        |        |        |       |        |        |       |        |        |       |        |        |        |       |       |       |        |        |        |        |        |        |       |
| COPD                        | 490    | 491    | 492    | 493    | 494    | 495    | 496    | 491.1  | 491.2  | 491.21 | 491.22 | 491.8  | 491.9  | 492.8  | 493.01 | 493.02 | 493.1  | 493.11 | 493.12 | 493.2  | 493.21 | 493.22 | 493.8  | 493.81 | 493.82 | 493.9  | 493.91 | 493.92 | 494.1  | 495.1  | 495.2  | 495.3  | 495.4  | 495.5  | 495.6  | 495.7  | 495.8  | 495.9  |        |        |        |        |        |        |        |        |        |        |        |        |       |        |        |       |        |        |       |        |        |        |       |       |       |        |        |        |        |        |        |       |
| Ischaemic heart diseases    | 410.01 | 410.02 | 410.1  | 410.11 | 410.12 | 410.2  | 410.21 | 410.22 | 410.3  | 410.31 | 410.32 | 410.4  | 410.41 | 410.42 | 410.5  | 410.51 | 410.52 | 410.6  | 410.61 | 410.62 | 410.7  | 410.71 | 410.72 | 410.8  | 410.81 | 410.82 | 410.9  | 410.91 | 410.92 | 411    | 411.1  | 411.8  | 411.81 | 411.89 | 413    | 413.1  | 413.9  | 414    | 414.01 | 414.02 | 414.03 | 414.04 | 414.05 | 414.06 | 414.07 | 414.1  | 414.11 | 414.12 | 414.19 | 414.2  | 414.3 | 414.4  | 414.8  | 414.9 | 410    | 412    |       |        |        |        |       |       |       |        |        |        |        |        |        |       |
| Cancer                      | 140    | 140.1  | 140.3  | 140.4  | 140.5  | 140.6  | 140.8  | 140.9  | 141    | 141.1  | 141.2  | 141.3  | 141.4  | 141.5  | 141.6  | 141.8  | 141.9  | 142    | 142.1  | 142.2  | 142.8  | 142.9  | 143    | 143.1  | 143.8  | 143.9  | 144    | 144.1  | 144.8  | 144.9  | 145    | 145.1  | 145.2  | 145.3  | 145.4  | 145.5  | 145.6  | 145.8  | 145.9  | 146    | 146.1  | 146.2  | 146.3  | 146.4  | 146.5  | 146.6  | 146.7  | 146.8  | 146.9  | 147    | 147.1 | 147.2  | 147.3  | 147.8 | 147.9  | 148    | 148.1 | 148.2  | 148.3  | 148.8  | 148.9 | 149   | 149.1 | 149.8  | 149.9  | 150    |        |        |        |       |

150.1 150.2 150.3 150.4 150.5 150.8 150.9 151 151.1 151.2 151.3  
151.4 151.5 151.6 151.8 151.9 152 152.1 152.2 152.3 152.8 152.9  
153 153.1 153.2 153.3 153.4 153.5 153.6 153.7 153.8 153.9 154  
154.1 154.2 154.3 154.8 155 155.1 155.2 156 156.1 156.2 156.8  
156.9 157 157.1 157.2 157.3 157.4 157.8 157.9 158 158.8 158.9  
159 159.1 159.8 159.9 160 160.1 160.2 160.3 160.4 160.5 160.8  
160.9 161 161.1 161.2 161.3 161.8 161.9 162 162.2 162.3 162.4  
162.5 162.8 162.9 163 163.1 163.8 163.9 164 164.1 164.2 164.3  
164.8 164.9 165 165.8 165.9 170 170.1 170.2 170.3 170.4 170.5  
170.6 170.7 170.8 170.9 171 171.2 171.3 171.4 171.5 171.6 171.7  
171.8 171.9 172 172.1 172.2 172.3 172.4 172.5 172.6 172.7 172.8  
172.9 and 173 173.01 173.02 173.09 173.1 173.11 173.12 173.19 173.2  
173.21 173.22 173.29 173.3 173.31 173.32 173.39 173.4 173.41 173.42 173.49  
173.5 173.51 173.52 173.59 173.6 173.61 173.62 173.69 173.7 173.71 173.72  
173.79 173.8 173.81 173.82 173.89 173.9 173.91 173.92 173.99 174 174.1  
174.2 174.3 174.4 174.5 174.6 174.8 174.9 175 175.9 176 176.1  
176.2 176.3 176.4 176.5 176.8 176.9 179 180 180.1 180.8 180.9  
181 182 182.1 182.8 183 183.2 183.3 183.4 183.5 183.8 183.9  
184 184.1 184.2 184.3 184.4 184.8 184.9 185 186 186.9 187  
187.1 187.2 187.3 187.4 187.5 187.6 187.7 187.8 187.9 188 188.1  
188.2 188.3 188.4 188.5 188.6 188.7 188.8 188.9 189 189.1 189.2  
189.3 189.4 189.8 189.9 190 190.1 190.2 190.3 190.4 190.5 190.6  
190.7 190.8 190.9 191 191.1 191.2 191.3 191.4 191.5 191.6 191.7  
191.8 191.9 192 192.1 192.2 192.3 192.8 192.9 193 194 194.1  
194.3 194.4 194.5 194.6 194.8 194.9 195 195.1 195.2 195.3 195.4  
195.5 195.8 200 200.01 200.02 200.03 200.04 200.05 200.06 200.07 200.08  
200.1 200.11 200.12 200.13 200.14 200.15 200.16 200.17 200.18 200.2 200.21  
200.22 200.23 200.24 200.25 200.26 200.27 200.28 200.3 200.31 200.32 200.33  
200.34 200.35 200.36 200.37 200.38 200.4 200.41 200.42 200.43 200.44 200.45  
200.46 200.47 200.48 200.5 200.51 200.52 200.53 200.54 200.55 200.56 200.57  
200.58 200.6 200.61 200.62 200.63 200.64 200.65 200.66 200.67 200.68 200.7  
200.71 200.72 200.73 200.74 200.75 200.76 200.77 200.78 200.8 200.81 200.82  
200.83 200.84 200.85 200.86 200.87 200.88 201 201.01 201.02 201.03 201.04  
201.05 201.06 201.07 201.08 201.1 201.11 201.12 201.13 201.14 201.15 201.16  
201.17 201.18 201.2 201.21 201.22 201.23 201.24 201.25 201.26 201.27 201.28  
201.4 201.41 201.42 201.43 201.44 201.45 201.46 201.47 201.48 201.5 201.51  
201.52 201.53 201.54 201.55 201.56 201.57 201.58 201.6 201.61 201.62 201.63  
201.64 201.65 201.66 201.67 201.68 201.7 201.71 201.72 201.73 201.74 201.75  
201.76 201.77 201.78 201.9 201.91 201.92 201.93 201.94 201.95 201.96 201.97  
201.98 202 202.01 202.02 202.03 202.04 202.05 202.06 202.07 202.08 202.1  
202.11 202.12 202.13 202.14 202.15 202.16 202.17 202.18 202.2 202.21 202.22  
202.23 202.24 202.25 202.26 202.27 202.28 202.3 202.31 202.32 202.33 202.34  
202.35 202.36 202.37 202.38 202.4 202.41 202.42 202.43 202.44 202.45 202.46  
202.47 202.48 202.5 202.51 202.52 202.53 202.54 202.55 202.56 202.57 202.58  
202.6 202.61 202.62 202.63 202.64 202.65 202.66 202.67 202.68 202.7 202.71  
202.72 202.73 202.74 202.75 202.76 202.77 202.78 202.8 202.81 202.82 202.83  
202.84 202.85 202.86 202.87 202.88 202.9 202.91 202.92 202.93 202.94 202.95

202.96 202.97 202.98 203 203.01 203.02 203.1 203.11 203.12 203.8 203.81  
203.82 204 204.01 204.02 204.1 204.11 204.12 204.2 204.21 204.22 204.8  
204.81 204.82 204.9 204.91 204.92 205 205.01 205.02 205.1 205.11 205.12  
205.2 205.21 205.22 205.3 205.31 205.32 205.8 205.81 205.82 205.9 205.91  
205.92 206 206.01 206.02 206.1 206.11 206.12 206.2 206.21 206.22 206.8  
206.81 206.82 206.9 206.91 206.92 207 207.01 207.02 207.1 207.11 207.12  
207.2 207.21 207.22 207.8 207.81 207.82 208 208.01 208.02 208.1 208.11  
208.12 208.2 208.21 208.22 208.8 208.81 208.82 208.9 208.91 208.92 196  
196.1 196.2 196.3 196.5 196.6 196.8 196.9 197 197.1 197.2 197.3  
197.4 197.5 197.6 197.7 197.8 198 198.1 198.2 198.3 198.4 198.5  
198.6 198.7 198.8 198.81 198.82 198.89 199 199.1

**Supplementary Table 2. Formula of the variability measures**

| <b>Variability measure</b> | <b>Definition</b>                            |
|----------------------------|----------------------------------------------|
| Standard deviation         | $SD = \sqrt{\frac{\sum  x - \bar{x} ^2}{N}}$ |

**Supplementary Table 3. The baseline, and clinical characteristics of patients in the study cohorts of four quartiles remnant cholesterol.**

\* for  $p \leq 0.05$ , \*\* for  $p \leq 0.01$ , \*\*\* for  $p \leq 0.001$ , SD: standard deviation, ACEI: angiotensin-converting-enzyme inhibitors, ARB: angiotensin II receptor blockers, eGFR: estimated glomerular filtration rate.

| Characteristics                                 | All (N=75342)<br>Mean(SD);N or<br>Count(%) | Remnant<br>cholesterol,<br>mmol/L (Q1)<br>(N=18779)<br>Mean(SD);N or<br>Count(%) | Remnant<br>cholesterol,<br>mmol/L (Q2)<br>(N=18964)<br>Mean(SD);N or<br>Count(%) | Remnant<br>cholesterol,<br>mmol/L (Q3)<br>(N=18838)<br>Mean(SD);N or<br>Count(%) | Remnant<br>cholesterol,<br>mmol/L (Q4)<br>(N=18761)<br>Mean(SD);N or<br>Count(%) | P-value      |
|-------------------------------------------------|--------------------------------------------|----------------------------------------------------------------------------------|----------------------------------------------------------------------------------|----------------------------------------------------------------------------------|----------------------------------------------------------------------------------|--------------|
| Male gender                                     | 29905(39.69%)                              | 7697(40.98%)                                                                     | 7519(39.64%)                                                                     | 7245(38.45%)                                                                     | 7444(39.67%)                                                                     | <0.001*<br>* |
| Female gender                                   | 45437(60.30%)                              | 11082(59.01%)                                                                    | 11445(60.35%)                                                                    | 11593(61.54%)                                                                    | 11317(60.32%)                                                                    | <0.001*<br>* |
| Baseline age, year                              | 61.3(13.1);n=75342                         | 60.3(13.8);n=18779                                                               | 61.6(13.1);n=18964                                                               | 61.6(12.7);n=18838                                                               | 61.6(12.8);n=18761                                                               | <0.001*<br>* |
| <b>Remnant<br/>cholesterol</b>                  |                                            |                                                                                  |                                                                                  |                                                                                  |                                                                                  |              |
| Remnant<br>cholesterol, mmol/L                  | 0.8(0.5);n=75342                           | 0.3(0.1);n=18779                                                                 | 0.5(0.1);n=18964                                                                 | 0.78(0.09);n=18838                                                               | 1.5(0.7);n=18761                                                                 | <0.001*<br>* |
| Time weighted<br>remnant<br>cholesterol, mmol/L | 0.9(0.8);n=75342                           | 0.8(0.8);n=18779                                                                 | 0.8(0.7);n=18964                                                                 | 0.88(0.73);n=18838                                                               | 1.1(0.9);n=18761                                                                 | <0.001*<br>* |
| <b>Comorbidities</b>                            |                                            |                                                                                  |                                                                                  |                                                                                  |                                                                                  |              |
| Charlson's standard<br>comorbidity index        | 1.7(1.3);n=75342                           | 1.7(1.3);n=18779                                                                 | 1.8(1.3);n=18964                                                                 | 1.8(1.2);n=18838                                                                 | 1.8(1.2);n=18761                                                                 | <0.001*<br>* |
| Dyslipidaemia                                   | 1288(1.70%)                                | 188(1.00%)                                                                       | 280(1.47%)                                                                       | 348(1.84%)                                                                       | 472(2.51%)                                                                       | <0.001*<br>* |
| Diabetes mellitus                               | 7889(10.47%)                               | 1395(7.42%)                                                                      | 1638(8.63%)                                                                      | 2064(10.95%)                                                                     | 2792(14.88%)                                                                     | <0.001*<br>* |

|                                       |               |              |              |               |               |              |
|---------------------------------------|---------------|--------------|--------------|---------------|---------------|--------------|
| Hypertension                          | 39026(51.79%) | 8800(46.86%) | 9815(51.75%) | 10104(53.63%) | 10307(54.93%) | <0.001*<br>* |
| Acute myocardial infarction           | 173(0.22%)    | 30(0.15%)    | 48(0.25%)    | 48(0.25%)     | 47(0.25%)     | 0.149        |
| Ischemic heart disease                | 1516(2.01%)   | 322(1.71%)   | 362(1.90%)   | 395(2.09%)    | 437(2.32%)    | <0.001*<br>* |
| Heart failure                         | 2932(3.89%)   | 557(2.96%)   | 652(3.43%)   | 784(4.16%)    | 939(5.00%)    | <0.001*<br>* |
| Atrial fibrillation/Atrial flutter    | 446(0.59%)    | 116(0.61%)   | 120(0.63%)   | 106(0.56%)    | 104(0.55%)    | 0.688        |
| Cerebrovascular accident, stroke      | 545(0.72%)    | 102(0.54%)   | 144(0.75%)   | 146(0.77%)    | 153(0.81%)    | 0.008*       |
| Mental health diseases                | 668(0.88%)    | 144(0.76%)   | 168(0.88%)   | 160(0.84%)    | 196(1.04%)    | 0.034*       |
| Chronic obstructive pulmonary disease | 189(0.25%)    | 66(0.35%)    | 57(0.30%)    | 38(0.20%)     | 28(0.14%)     | <0.001*<br>* |
| Gastrointestinal bleeding             | 461(0.61%)    | 110(0.58%)   | 111(0.58%)   | 119(0.63%)    | 121(0.64%)    | 0.828        |
| Other bleeding                        | 982(1.30%)    | 282(1.50%)   | 251(1.32%)   | 248(1.31%)    | 201(1.07%)    | 0.003*       |
| Hip fractures                         | 419(0.55%)    | 105(0.55%)   | 100(0.52%)   | 122(0.64%)    | 92(0.49%)     | 0.203        |
| History of falls                      | 1047(1.38%)   | 249(1.32%)   | 263(1.38%)   | 282(1.49%)    | 253(1.34%)    | 0.499        |
| Accident fall                         | 1044(1.38%)   | 249(1.32%)   | 262(1.38%)   | 281(1.49%)    | 252(1.34%)    | 0.515        |
| Liver diseases                        | 269(0.35%)    | 87(0.46%)    | 68(0.35%)    | 56(0.29%)     | 58(0.30%)     | 0.028*       |
| Renal diseases                        | 105(0.13%)    | 26(0.13%)    | 18(0.09%)    | 31(0.16%)     | 30(0.15%)     | 0.249        |
| Cancer                                | 683(0.90%)    | 177(0.94%)   | 180(0.94%)   | 176(0.93%)    | 150(0.79%)    | 0.361        |
| <b>Medications</b>                    |               |              |              |               |               |              |
| ACEI/ARB                              | 8890(11.79%)  | 1755(9.34%)  | 2100(11.07%) | 2282(12.11%)  | 2753(14.67%)  | <0.001*<br>* |

|                                        |                    |                   |                   |                    |                    |              |
|----------------------------------------|--------------------|-------------------|-------------------|--------------------|--------------------|--------------|
| Anticoagulants                         | 37246(49.43%)      | 8143(43.36%)      | 9028(47.60%)      | 9662(51.28%)       | 10413(55.50%)      | <0.001*<br>* |
| Antiplatelets                          | 7921(10.51%)       | 1662(8.85%)       | 1966(10.36%)      | 2051(10.88%)       | 2242(11.95%)       | <0.001*<br>* |
| Lipid-lowering drugs                   | 7021(9.31%)        | 1200(6.39%)       | 1624(8.56%)       | 1840(9.76%)        | 2357(12.56%)       | <0.001*<br>* |
| Statins and fibrates                   | 8460(11.22%)       | 1353(7.20%)       | 1825(9.62%)       | 2207(11.71%)       | 3075(16.39%)       | <0.001*<br>* |
| Nitrates                               | 6148(8.16%)        | 1265(6.73%)       | 1548(8.16%)       | 1544(8.19%)        | 1791(9.54%)        | <0.001*<br>* |
| Diuretics for heart failure            | 1738(2.30%)        | 396(2.10%)        | 418(2.20%)        | 425(2.25%)         | 499(2.65%)         | 0.002*       |
| Diuretics for hypertension             | 13805(18.32%)      | 2610(13.89%)      | 3273(17.25%)      | 3655(19.40%)       | 4267(22.74%)       | <0.001*<br>* |
| Calcium channel blockers               | 15126(20.07%)      | 3090(16.45%)      | 3581(18.88%)      | 4086(21.69%)       | 4369(23.28%)       | <0.001*<br>* |
| Beta blockers                          | 15006(19.91%)      | 2792(14.86%)      | 3503(18.47%)      | 4042(21.45%)       | 4669(24.88%)       | <0.001*<br>* |
| Non-steroidal anti-inflammatory drugs  | 7594(10.07%)       | 1604(8.54%)       | 1890(9.96%)       | 1964(10.42%)       | 2136(11.38%)       | <0.001*<br>* |
| Anti-diabetic drugs                    | 15121(20.06%)      | 2860(15.22%)      | 3483(18.36%)      | 3996(21.21%)       | 4782(25.48%)       | <0.001*<br>* |
| <b>Laboratory testing</b>              |                    |                   |                   |                    |                    |              |
| eGFR (MDRD), mL/min/1.73m <sup>2</sup> | 73.7(19.0);n=42133 | 76.2(19.3);n=9633 | 74.1(18.8);n=9594 | 73.2(18.8);n=10493 | 71.9(18.8);n=12413 | <0.001*<br>* |
| Urea, mmol/L                           | 5.9(2.1);n=41876   | 5.8(2.2);n=9570   | 5.9(2.19);n=9544  | 5.88(2.07);n=10426 | 5.94(2.17);n=12336 | <0.001*<br>* |
| Creatinine, umol/L                     | 87.9(29.7);n=42133 | 85.7(29.3);n=9633 | 87.4(30.0);n=9594 | 88.0(26.7);n=10493 | 89.7(31.9);n=12413 | <0.001*<br>* |



|                                            |                     |                     |                     |                     |                     |              |
|--------------------------------------------|---------------------|---------------------|---------------------|---------------------|---------------------|--------------|
| Aspartate transaminase, U/L                | 28.9(59.0);n=16331  | 26.8(60.8);n=3698   | 27.3(43.6);n=3684   | 29.5(58.3);n=4037   | 31.0(67.6);n=4912   | <0.001*<br>* |
| Alanine transaminase, U/L                  | 28.4(56.8);n=18912  | 27.8(90.0);n=4212   | 26.9(43.6);n=4157   | 28.7(46.5);n=4552   | 29.6(39.2);n=5991   | <0.001*<br>* |
| <b>Blood pressures</b>                     |                     |                     |                     |                     |                     |              |
| Systolic blood pressure, mmHg              | 139.3(21.1);n=73878 | 136.6(21.5);n=18436 | 139.6(21.1);n=18610 | 140.4(20.7);n=18459 | 140.6(20.7);n=18373 | <0.001*<br>* |
| SD of systolic blood pressure              | 13.7(5.8);n=70357   | 13.2(5.8);n=17604   | 13.68(5.74);n=17764 | 13.8(5.7);n=17582   | 14.0(5.8);n=17407   | <0.001*<br>* |
| Diastolic blood pressure, mmHg             | 76.3(11.4);n=73878  | 75.2(11.4);n=18436  | 76.3(11.4);n=18610  | 76.8(11.3);n=18459  | 77.1(11.5);n=18373  | <0.001*<br>* |
| <b>Diabetes profile</b>                    |                     |                     |                     |                     |                     |              |
| HbA1C, %                                   | 7.5(1.7);n=12208    | 7.3(1.7);n=2329     | 7.4(1.7);n=2602     | 7.52(1.72);n=3180   | 7.7(1.7);n=4097     | <0.001*<br>* |
| SD of HbA1C                                | 0.7(0.7);n=8688     | 0.68(0.65);n=1615   | 0.71(0.69);n=1844   | 0.74(0.73);n=2290   | 0.8(0.7);n=2939     | <0.001*<br>* |
| Time weighted mean HbA1C, %                | 7.2(1.2);n=13251    | 7.2(1.26);n=2528    | 7.22(1.22);n=2938   | 7.22(1.32);n=3502   | 7.3(1.2);n=4283     | 0.077        |
| Fasting glucose, mmol/L                    | 6.9(3.0);n=26975    | 6.6(2.9);n=5737     | 6.7(2.8);n=6052     | 7.0(3.0);n=6816     | 7.2(3.2);n=8370     | <0.001*<br>* |
| SD of fasting glucose                      | 1.3(1.6);n=13653    | 1.2(1.5);n=2661     | 1.2(1.6);n=2905     | 1.25(1.51);n=3394   | 1.3(1.6);n=4693     | <0.001*<br>* |
| Time weighted mean fasting glucose, mmol/L | 6.7(2.4);n=21939    | 6.5(2.5);n=4294     | 6.6(2.5);n=4859     | 6.8(2.5);n=5690     | 7.0(2.3);n=7096     | <0.001*<br>* |
| <b>Lipid profile</b>                       |                     |                     |                     |                     |                     |              |
| Triglyceride, mmol/L                       | 1.6(1.1);n=75342    | 0.8(0.4);n=18779    | 1.2(0.3);n=18964    | 1.7(0.4);n=18838    | 2.7(1.6);n=18761    | <0.001*<br>* |
| SD of triglyceride                         | 0.5(0.5);n=75022    | 0.3(0.3);n=18695    | 0.3(0.3);n=18885    | 0.46(0.4);n=18751   | 0.8(0.8);n=18691    | <0.001*<br>* |

|                                                     |                  |                    |                    |                    |                    |              |
|-----------------------------------------------------|------------------|--------------------|--------------------|--------------------|--------------------|--------------|
| Time weighted mean triglyceride, mmol/L             | 1.5(0.5);n=75274 | 1.3(0.4);n=18755   | 1.4(0.4);n=18955   | 1.6(0.4);n=18823   | 1.8(0.6);n=18741   | <0.001*<br>* |
| Low-density lipoprotein, mmol/L                     | 3.2(0.9);n=75342 | 3.0(0.8);n=18779   | 3.2(0.9);n=18964   | 3.3(0.9);n=18838   | 3.1(1.0);n=18761   | <0.001*<br>* |
| SD of low-density lipoprotein                       | 0.6(0.3);n=73404 | 0.5(0.3);n=18348   | 0.58(0.31);n=18589 | 0.62(0.32);n=18409 | 0.64(0.32);n=18058 | <0.001*<br>* |
| Time weighted mean low-density lipoprotein, mmol/L  | 2.7(0.5);n=73445 | 2.68(0.48);n=18347 | 2.72(0.47);n=18621 | 2.73(0.48);n=18454 | 2.7(0.51);n=18023  | <0.001*<br>* |
| High-density lipoprotein, mmol/L                    | 1.3(0.4);n=75342 | 1.6(0.4);n=18779   | 1.4(0.3);n=18964   | 1.3(0.3);n=18838   | 1.2(0.3);n=18761   | <0.001*<br>* |
| SD of high-density lipoprotein                      | 0.2(0.1);n=71219 | 0.18(0.11);n=17824 | 0.17(0.09);n=18067 | 0.16(0.09);n=17823 | 0.15(0.09);n=17505 | <0.001*<br>* |
| Time weighted mean high-density lipoprotein, mmol/L | 1.3(0.2);n=71256 | 1.4(0.2);n=17820   | 1.4(0.2);n=18104   | 1.3(0.19);n=17869  | 1.3(0.2);n=17463   | <0.001*<br>* |
| Total cholesterol, mmol/L                           | 5.3(1.0);n=75342 | 4.9(0.9);n=18779   | 5.2(1.0);n=18964   | 5.4(1.0);n=18838   | 5.7(1.1);n=18761   | <0.001*<br>* |
| SD of total cholesterol                             | 0.7(0.4);n=75061 | 0.6(0.3);n=18716   | 0.6(0.3);n=18884   | 0.69(0.35);n=18756 | 0.8(0.4);n=18705   | <0.001*<br>* |
| Time weighted mean total cholesterol, mmol/L        | 4.8(0.5);n=75342 | 4.7(0.6);n=18779   | 4.76(0.54);n=18964 | 4.8(0.53);n=18838  | 4.84(0.54);n=18761 | <0.001*<br>* |

**Supplementary Table 4. The outcome of patients in the study cohorts of four quartiles remnant cholesterol.**

IQR: interquartile range

| Characteristics                                                     | All (N=75342)<br>Median<br>(IQR);N or<br>Count(%) | Remnant<br>cholesterol,<br>mmol/L (Q1)<br>(N=18779)<br>Median<br>(IQR);N or<br>Count(%) | Remnant<br>cholesterol,<br>mmol/L (Q2)<br>(N=18964)<br>Median<br>(IQR);N or<br>Count(%) | Remnant<br>cholesterol,<br>mmol/L (Q3)<br>(N=18838)<br>Median<br>(IQR);N or<br>Count(%) | Remnant<br>cholesterol,<br>mmol/L (Q4)<br>(N=18761)<br>Median<br>(IQR);N or<br>Count(%) | P-value  |
|---------------------------------------------------------------------|---------------------------------------------------|-----------------------------------------------------------------------------------------|-----------------------------------------------------------------------------------------|-----------------------------------------------------------------------------------------|-----------------------------------------------------------------------------------------|----------|
| All-cause mortality                                                 | 23475(31.15%)                                     | 5451(29.02%)                                                                            | 5814(30.65%)                                                                            | 5925(31.45%)                                                                            | 6285(33.50%)                                                                            | <0.001** |
| Cancer-related mortality                                            | 4349(5.77%)                                       | 994(5.29%)                                                                              | 1104(5.82%)                                                                             | 1118(5.93%)                                                                             | 1133(6.03%)                                                                             | <0.001** |
| Cardiovascular-related mortality                                    | 4533(6.01%)                                       | 1006(5.35%)                                                                             | 1104(5.82%)                                                                             | 1108(5.88%)                                                                             | 1315(7.00%)                                                                             | <0.001** |
| Ischaemic heart disease mortality                                   | 1925(2.55%)                                       | 384(2.04%)                                                                              | 470(2.47%)                                                                              | 483(2.56%)                                                                              | 588(3.13%)                                                                              | <0.001** |
| Respiratory-related mortality                                       | 7424(9.85%)                                       | 1913(10.18%)                                                                            | 1911(10.07%)                                                                            | 1805(9.58%)                                                                             | 1795(9.56%)                                                                             | <0.001** |
| Pneumonia-related mortality                                         | 6388(8.47%)                                       | 1642(8.74%)                                                                             | 1655(8.72%)                                                                             | 1559(8.27%)                                                                             | 1532(8.16%)                                                                             | <0.001** |
| Chronic lower respiratory related mortality                         | 250(0.33%)                                        | 90(0.47%)                                                                               | 69(0.36%)                                                                               | 40(0.21%)                                                                               | 51(0.27%)                                                                               | <0.001** |
| Gastrointestinal-related mortality                                  | 663(0.87%)                                        | 144(0.76%)                                                                              | 162(0.85%)                                                                              | 195(1.03%)                                                                              | 162(0.86%)                                                                              | <0.001** |
| Infection-related mortality                                         | 780(1.03%)                                        | 168(0.89%)                                                                              | 185(0.97%)                                                                              | 203(1.07%)                                                                              | 224(1.19%)                                                                              | <0.001** |
| Genitourinary-related mortality                                     | 1775(2.35%)                                       | 290(1.54%)                                                                              | 387(2.04%)                                                                              | 486(2.57%)                                                                              | 612(3.26%)                                                                              | <0.001** |
| Cerebrovascular-related mortality                                   | 1265(1.67%)                                       | 313(1.66%)                                                                              | 310(1.63%)                                                                              | 295(1.56%)                                                                              | 347(1.84%)                                                                              | <0.001** |
| Kidney-related mortality                                            | 1351(1.79%)                                       | 215(1.14%)                                                                              | 287(1.51%)                                                                              | 368(1.95%)                                                                              | 481(2.56%)                                                                              | <0.001** |
| Septicaemia-related mortality                                       | 676(0.89%)                                        | 130(0.69%)                                                                              | 160(0.84%)                                                                              | 179(0.95%)                                                                              | 207(1.10%)                                                                              | <0.001** |
| Diabetes mellitus related mortality                                 | 64(0.08%)                                         | 9(0.04%)                                                                                | 12(0.06%)                                                                               | 17(0.09%)                                                                               | 26(0.13%)                                                                               | 0.002*   |
| Haematological and endocrinological-related mortality               | 223(0.29%)                                        | 50(0.26%)                                                                               | 43(0.22%)                                                                               | 66(0.35%)                                                                               | 64(0.34%)                                                                               | <0.001** |
| Injury, poisoning and certain other consequences of external causes | 309(0.41%)                                        | 83(0.44%)                                                                               | 97(0.51%)                                                                               | 66(0.35%)                                                                               | 63(0.33%)                                                                               | 0.022*   |
| Unknown mortality                                                   | 2627(3.48%)                                       | 592(3.15%)                                                                              | 654(3.44%)                                                                              | 679(3.60%)                                                                              | 702(3.74%)                                                                              | <0.001** |

**Supplementary Figure 1. Distribution and association analysis between remnant cholesterol and HDL-C, LDL-C, TC, and TG.**

HDL-C = high density lipoprotein cholesterol, LDL-C = low density lipoprotein cholesterol, RR = risk ratios, TC = total cholesterol, TG = triglyceride

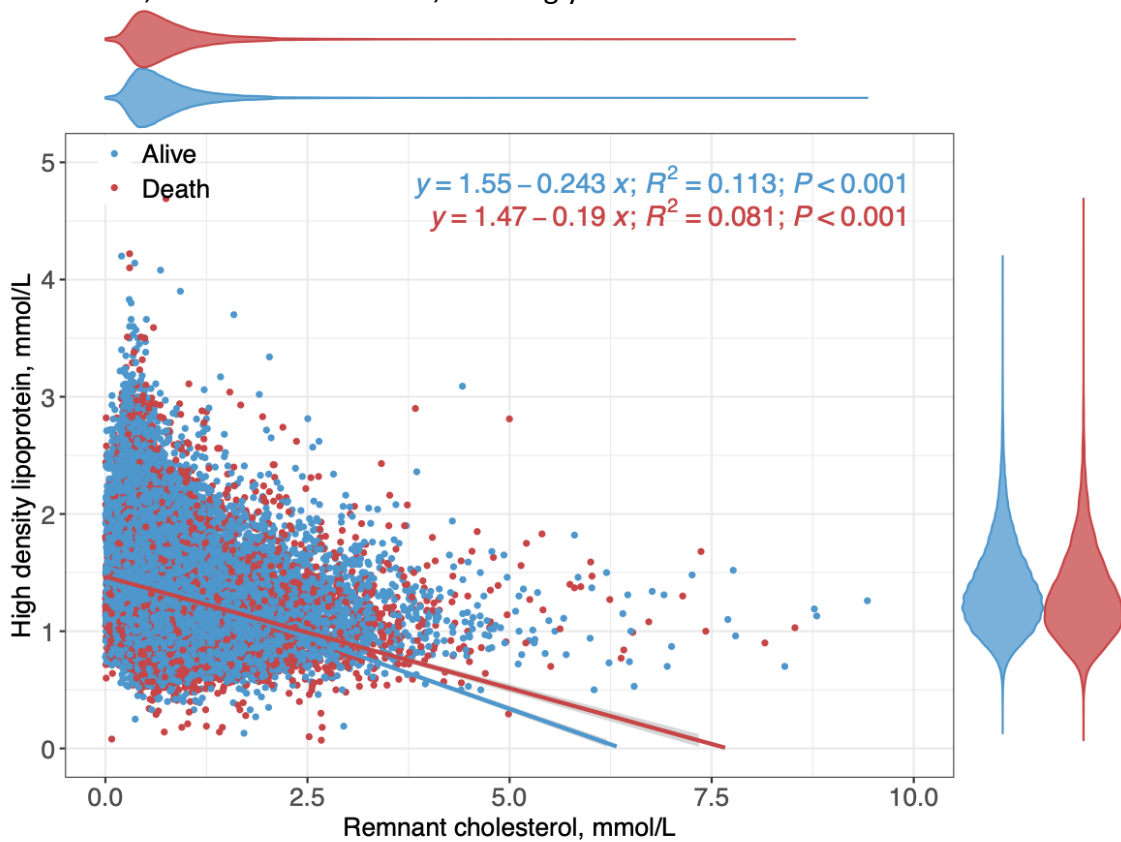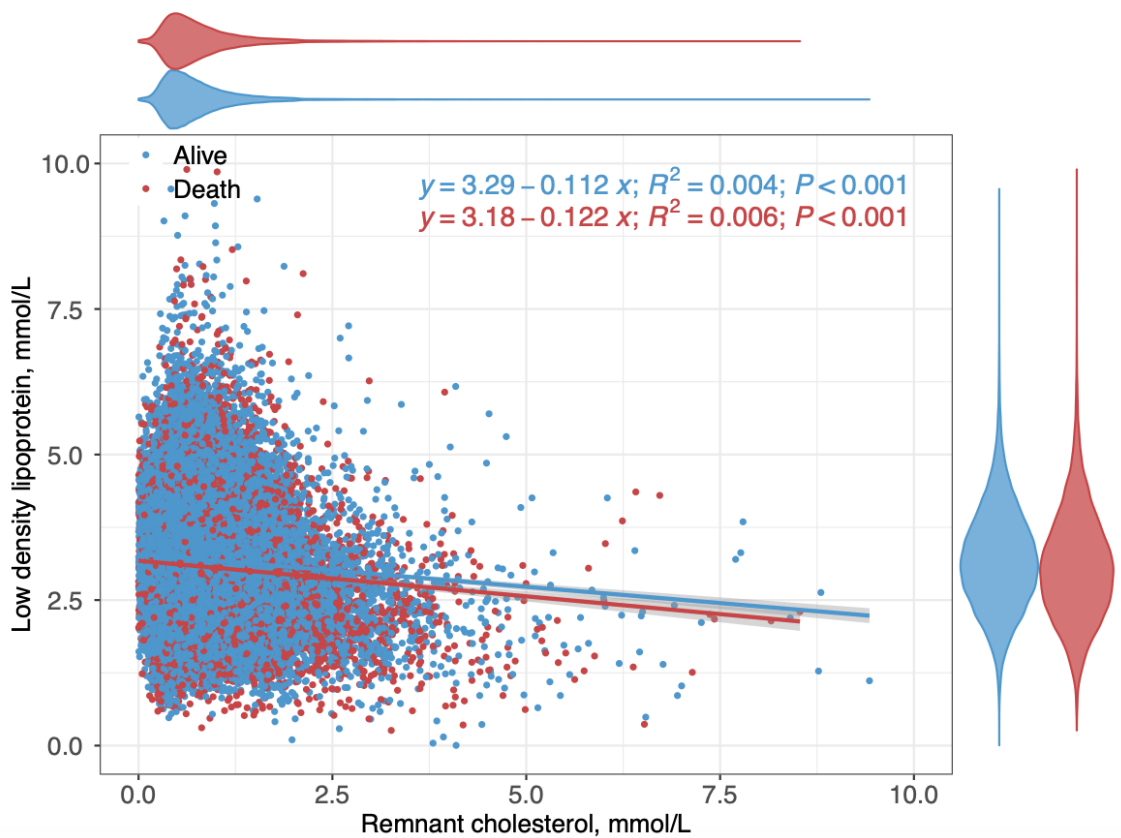

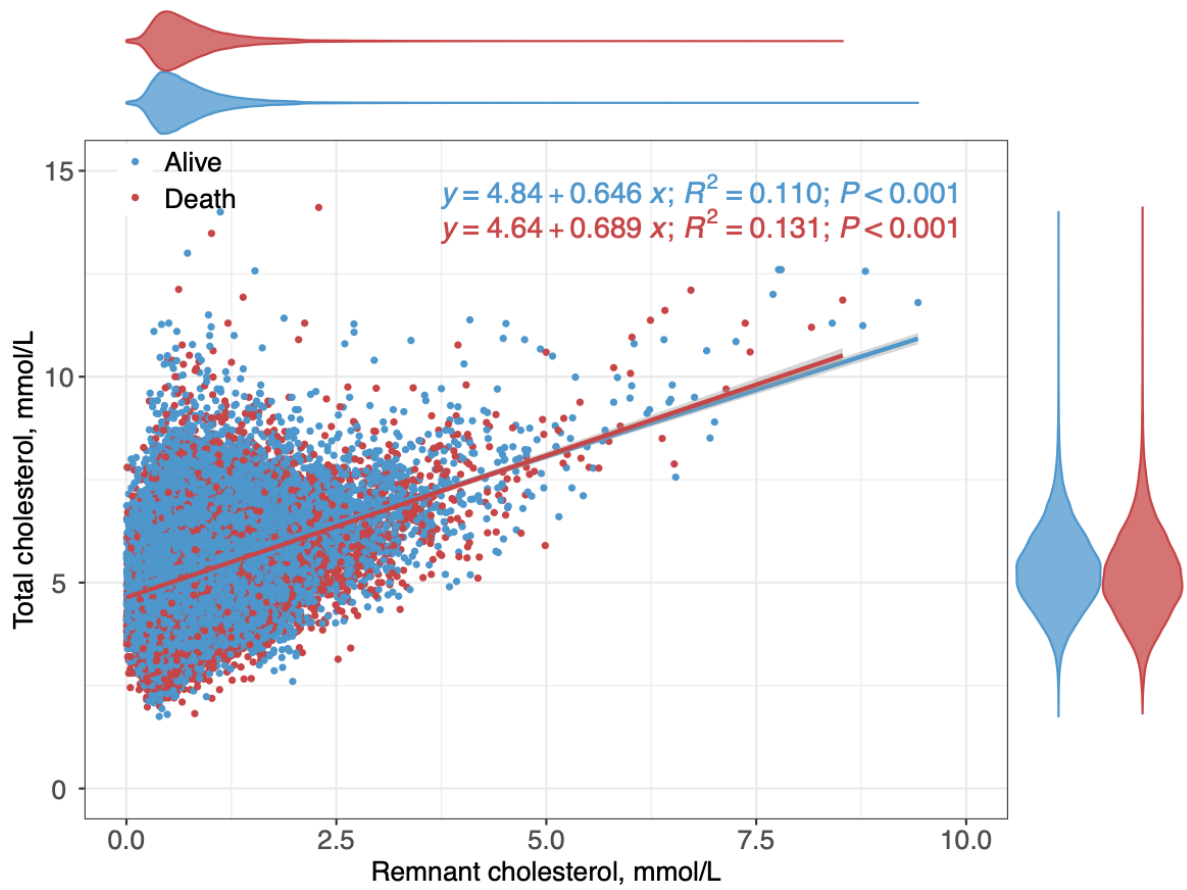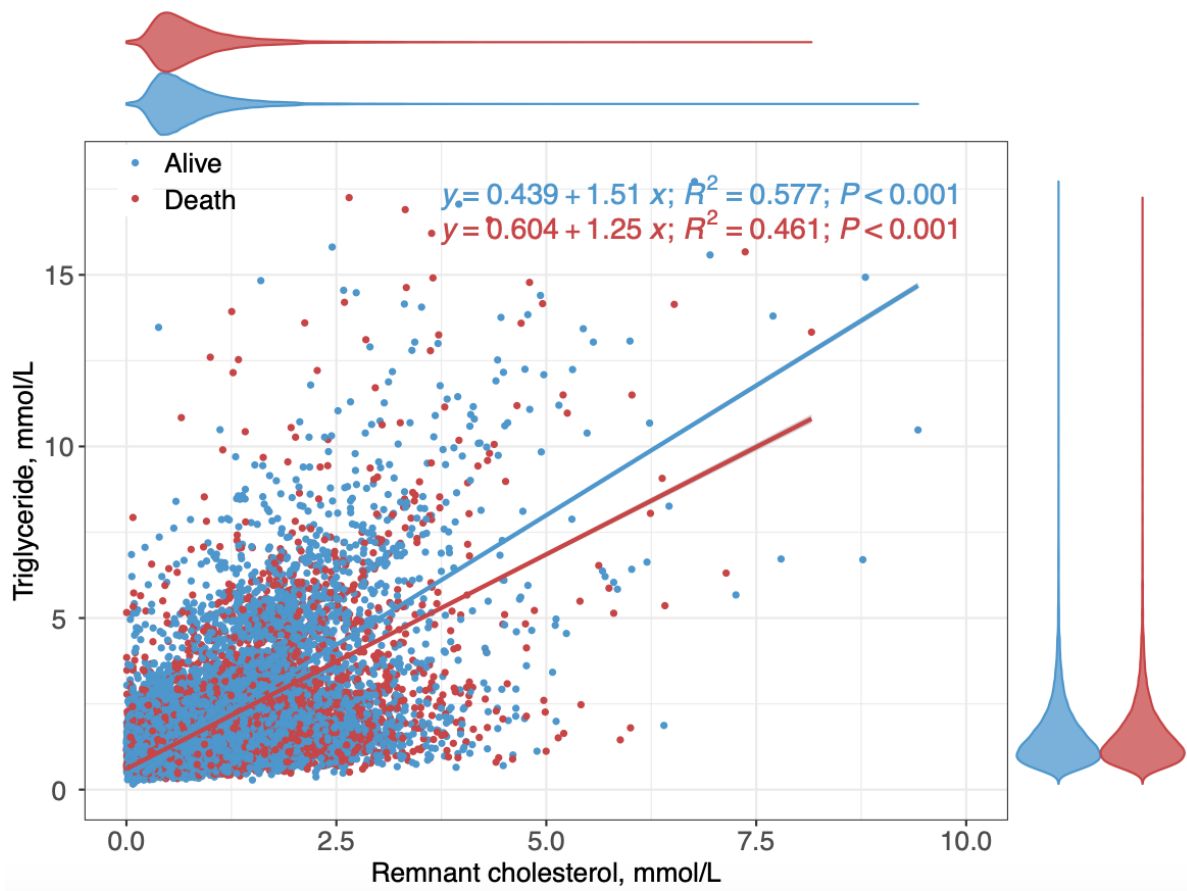

# Supplementary Figure 2. Cumulative incidence curves stratified by quartiles of remnant cholesterol to predict mortality outcome.

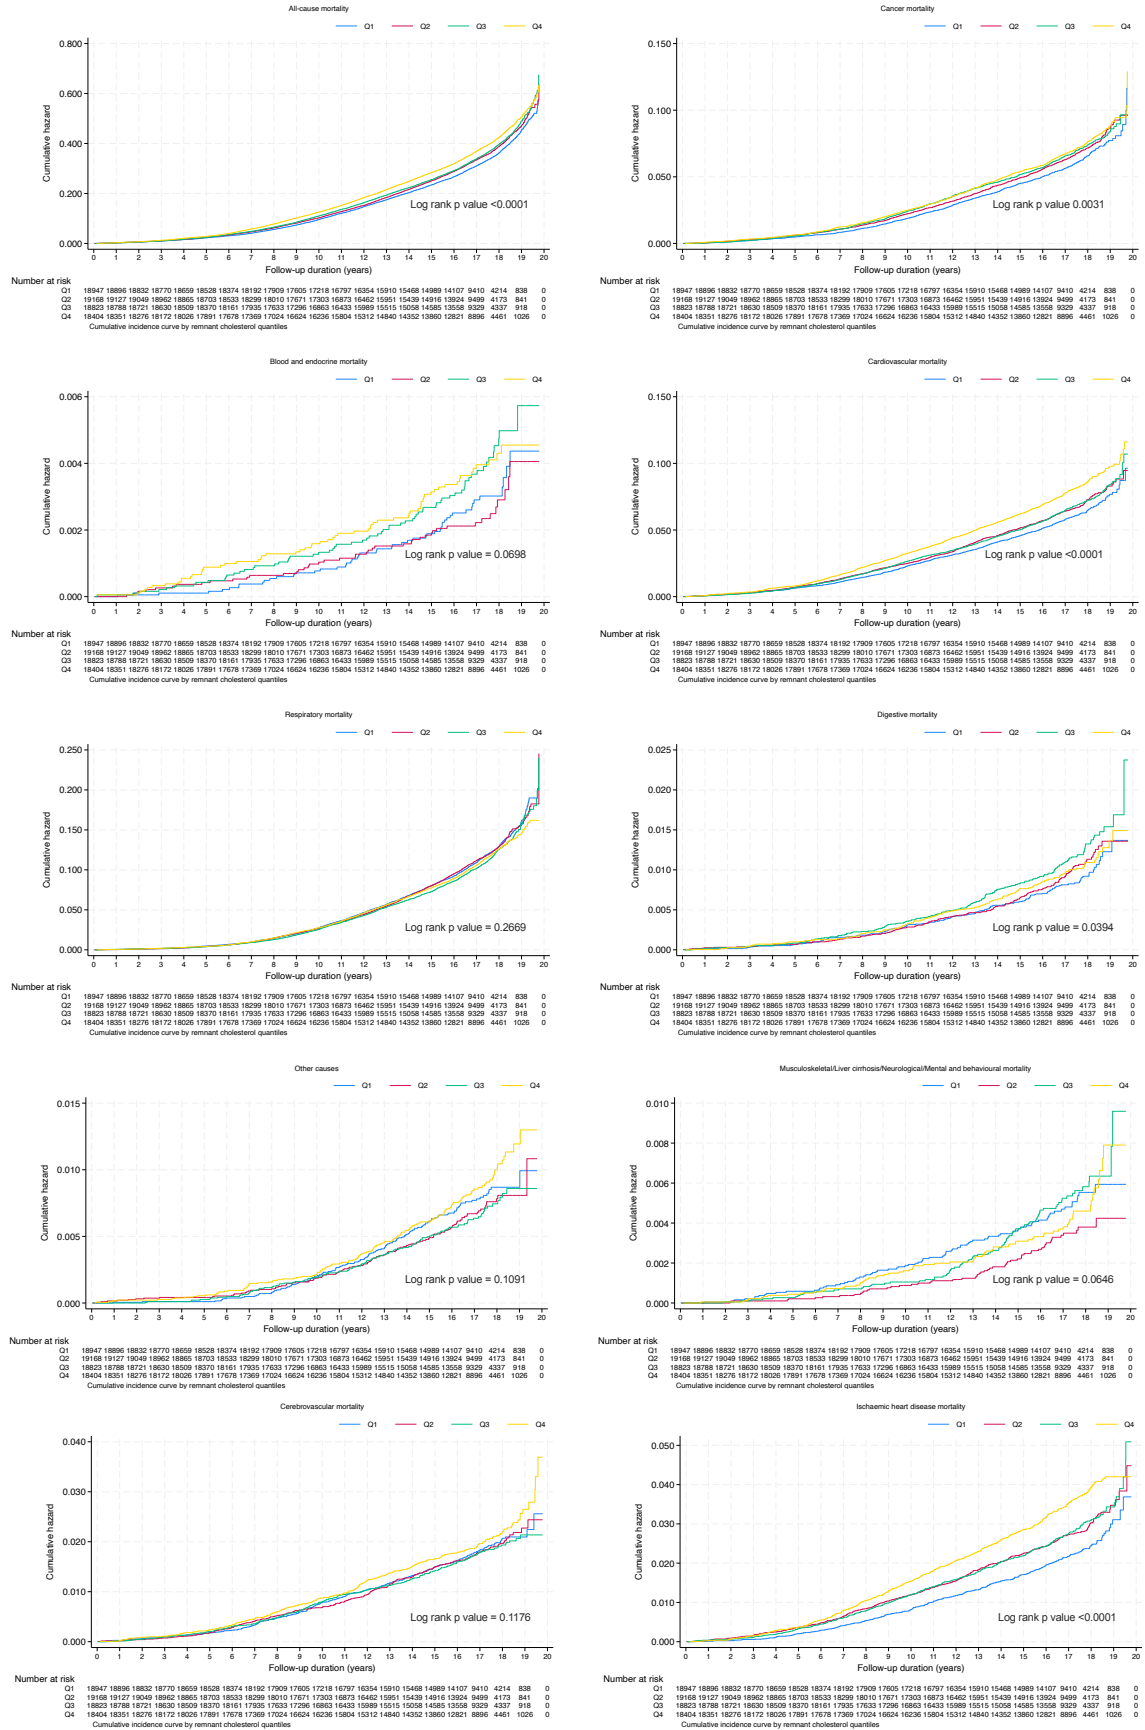

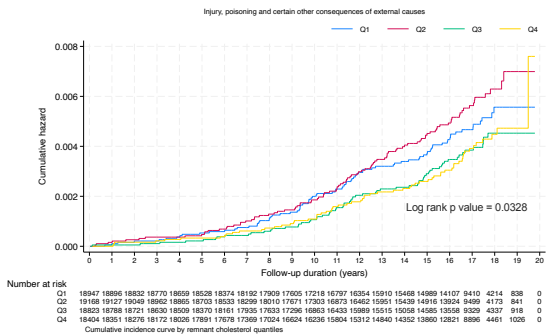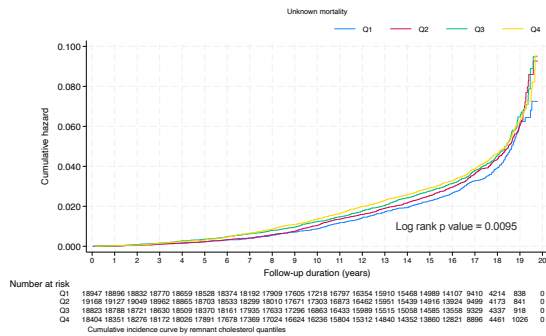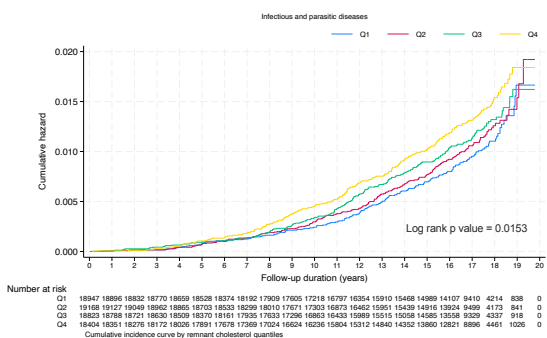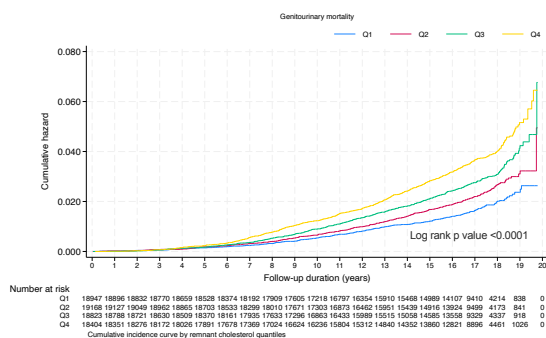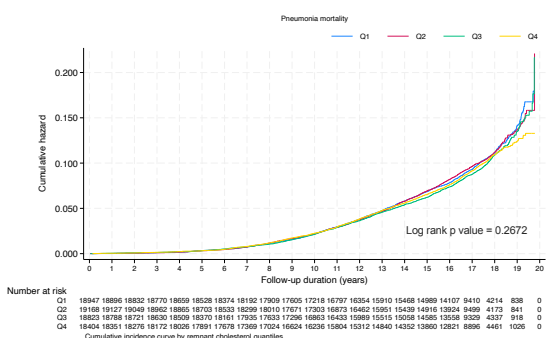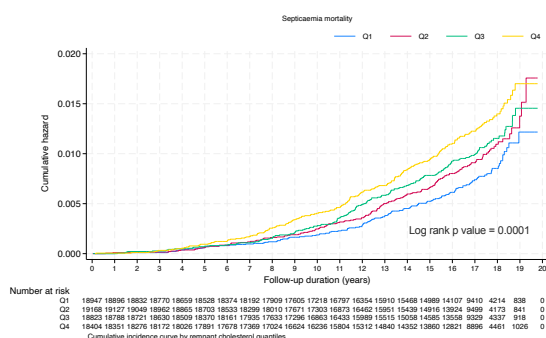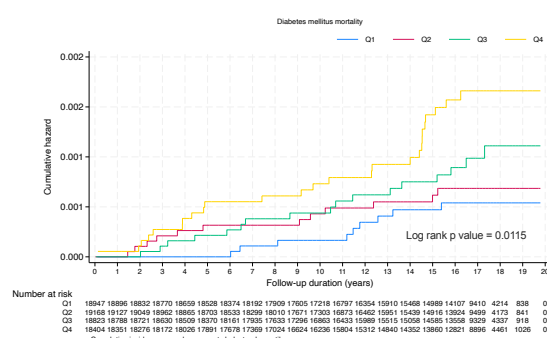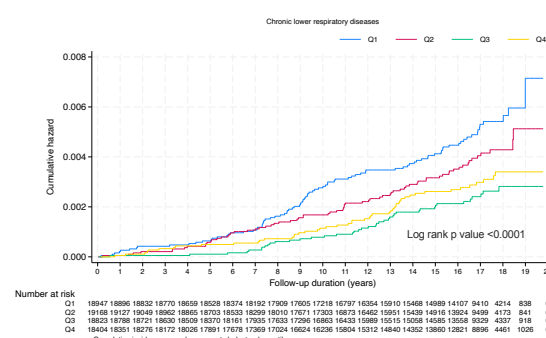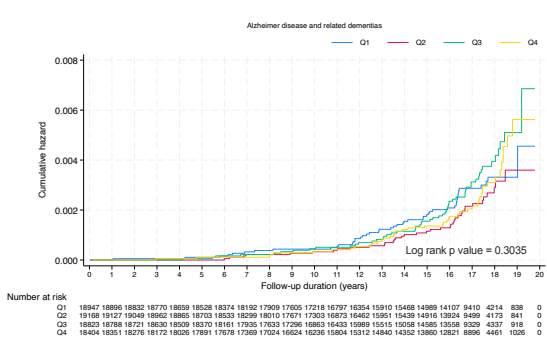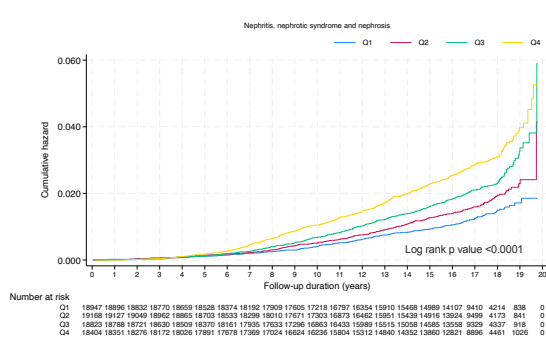

Supplementary Figure 3. Restricted cubic spline for remnant cholesterol predicting cause-related mortality on continuous scales.

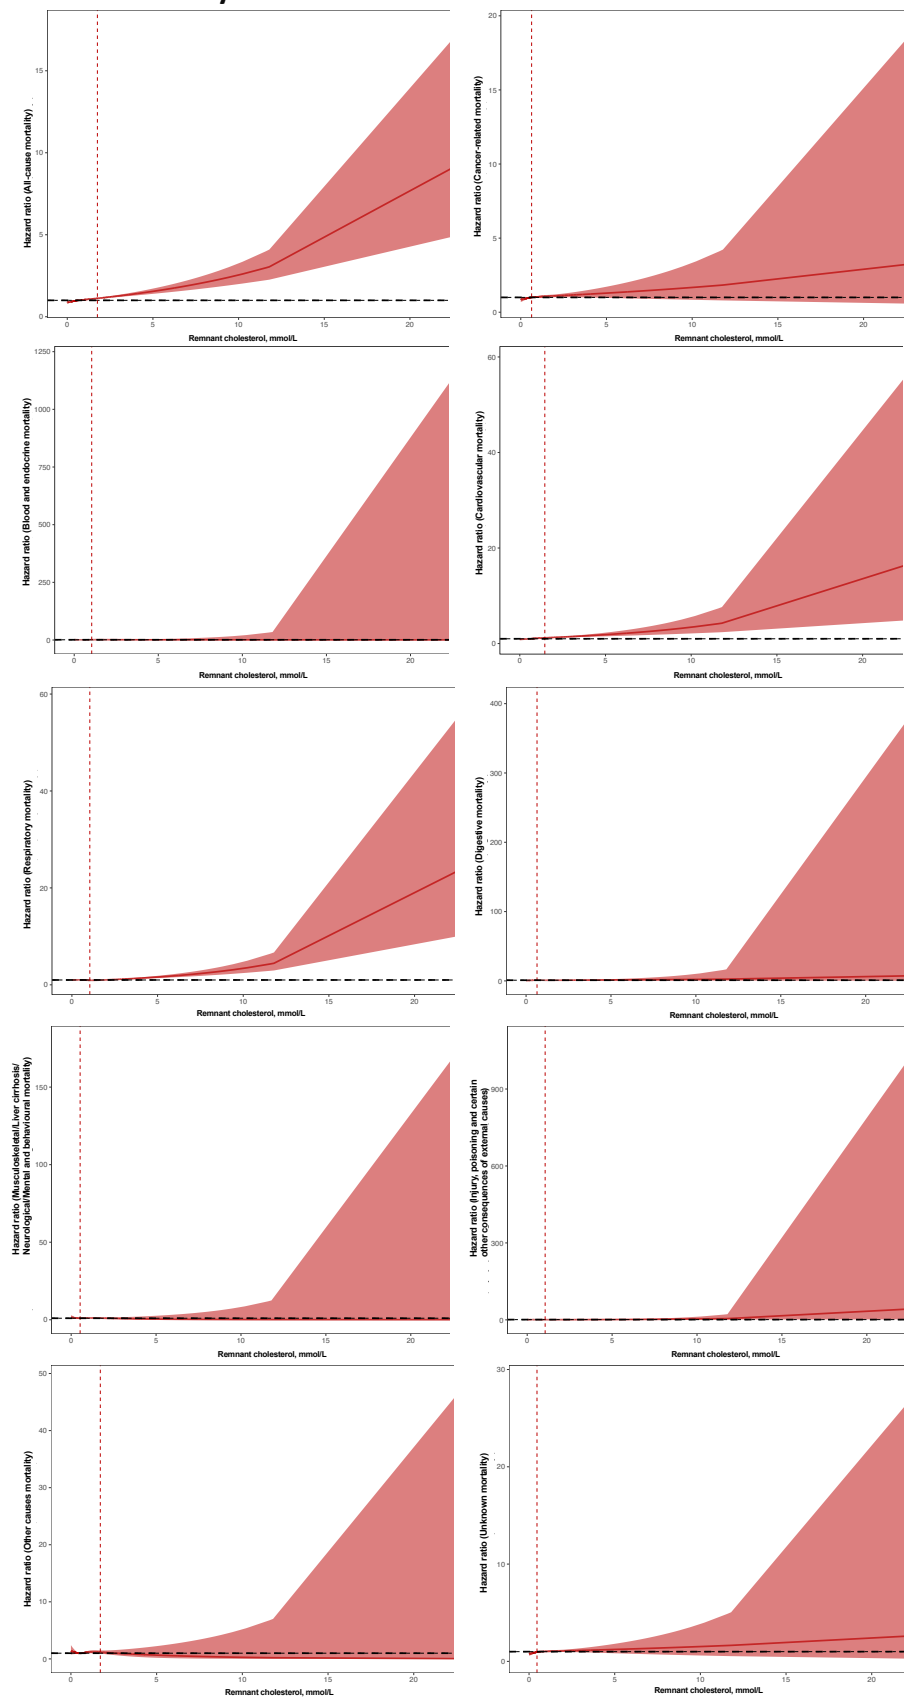



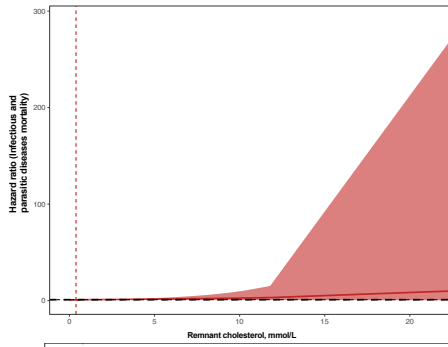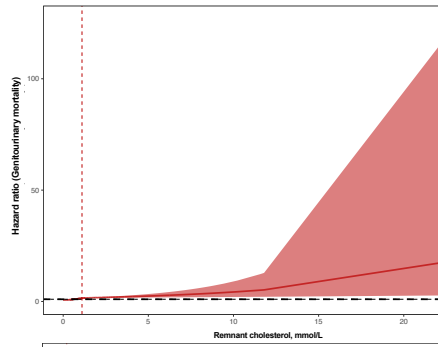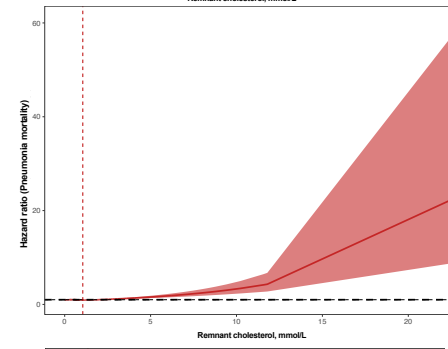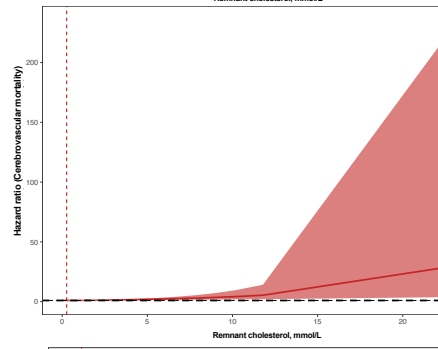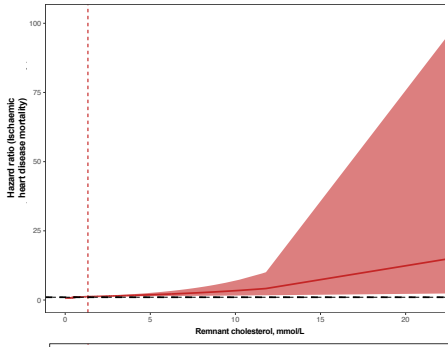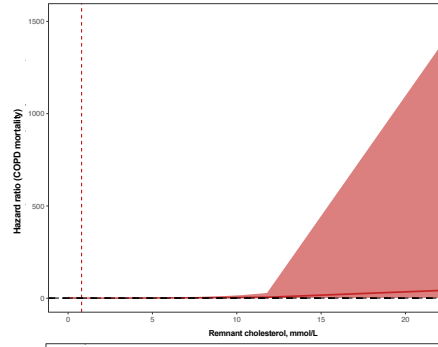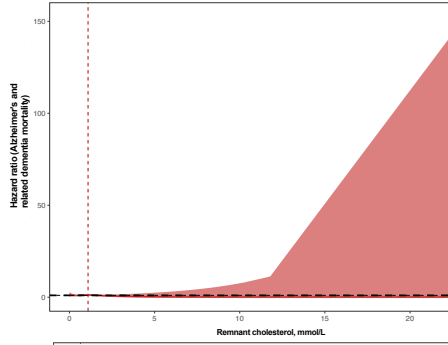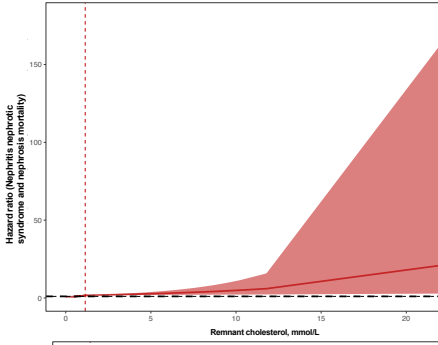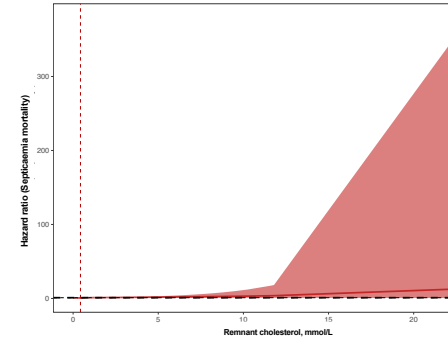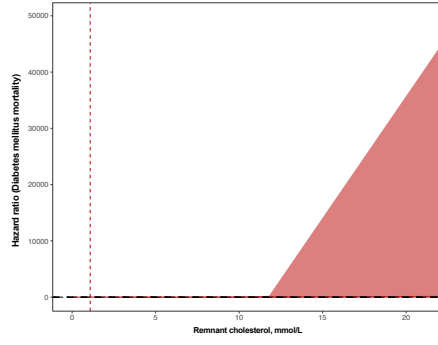

**Supplementary Figure 4. Restricted cubic spline comparing predicted cause-specific mortality between individuals with and without prior atherosclerotic cardiovascular disease.**

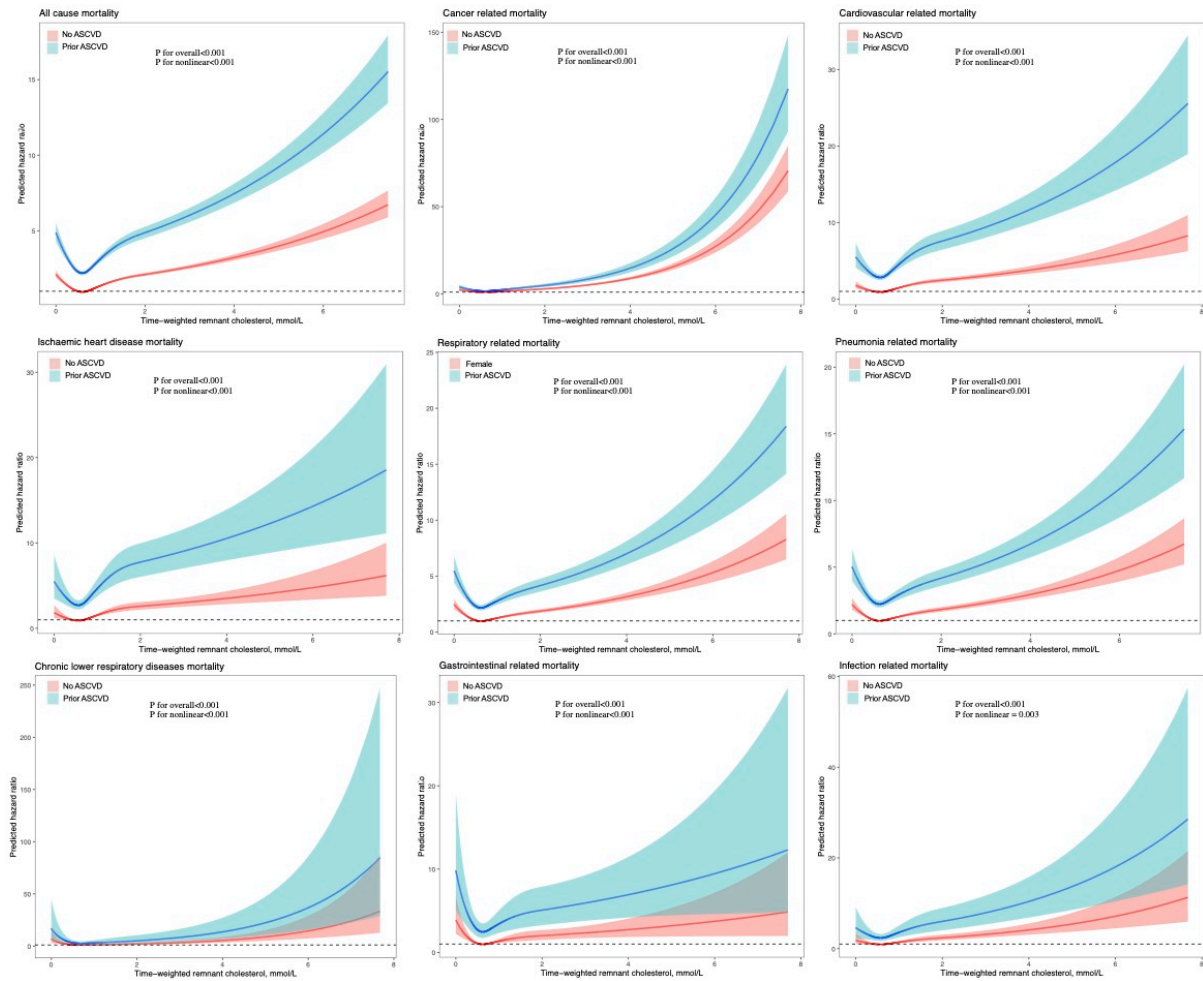

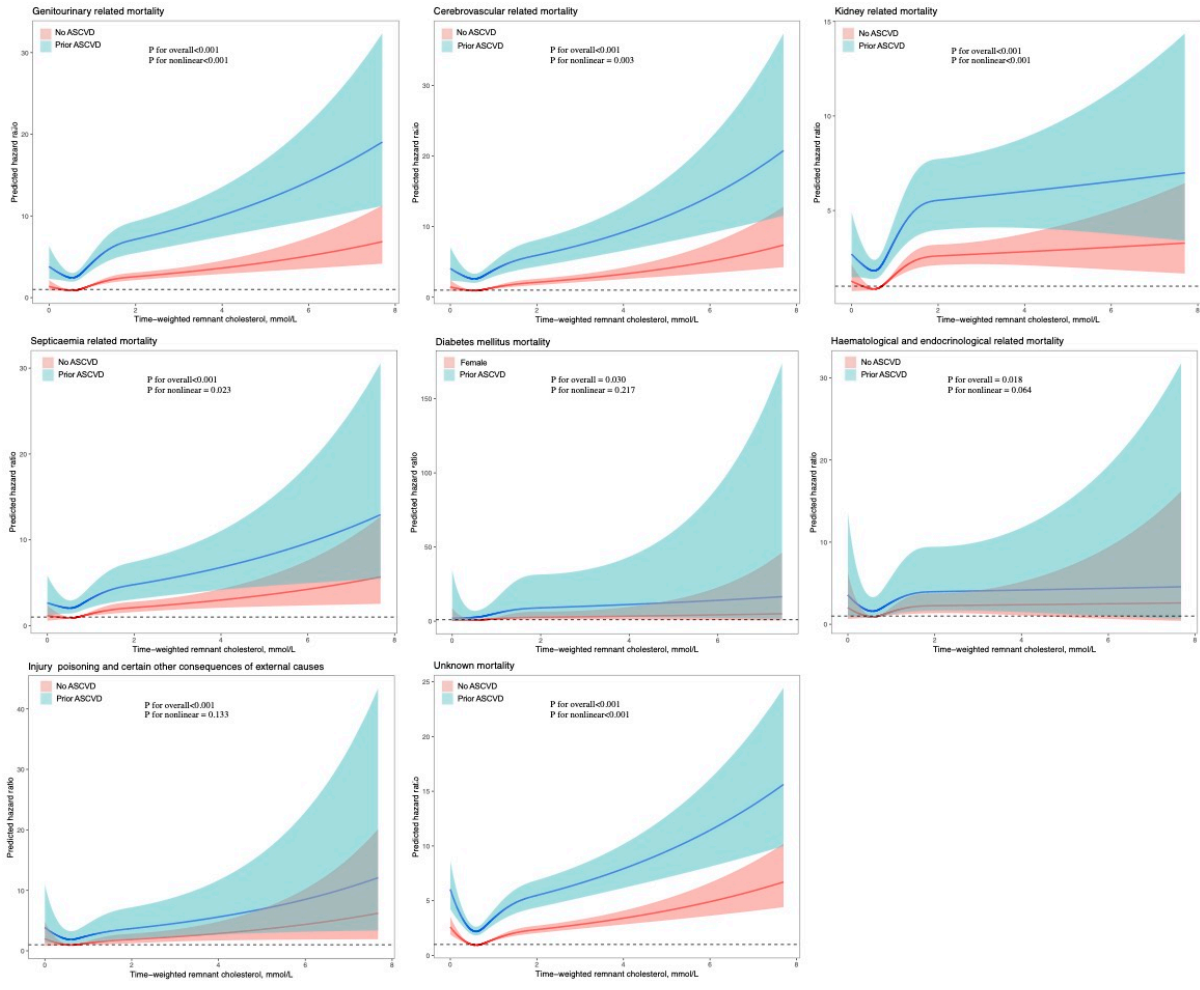

Supplement: Supplementary file [file media-1.pdf]
